# Supplementary material
Source: PubMed Central journal article supplement (PMC6179453)
Supplement: sc8b03587_si_001.pdf [file sc8b03587_si_001.pdf]

# Solvent-Free Method for the Copolymerization of Labile Sugar-Derived Building Blocks into Polyamides

*Aleksandra A. Wróblewska, Sander Stevens, Wessel Garsten, Stefaan M.A. De Wildeman,*

*Katrien V. Bernaerts\**

\*Katrien.Bernaerts@maastrichtuniversity.nl

Faculty of Science and Engineering, Biobased Materials, Maastricht University, P.O. Box

616, 6200MD Maastricht, the Netherlands

|                                                                                                                                                                                                                                                                                                                                                                                                           |    |
|-----------------------------------------------------------------------------------------------------------------------------------------------------------------------------------------------------------------------------------------------------------------------------------------------------------------------------------------------------------------------------------------------------------|----|
| <b>Figure S1</b> Calculation of the biobased content on an example of PA(12,GalXH) <sub>x</sub> -co-PA(12,10) <sub>100-x</sub> , with GalXH composed of 94 wt% bio-based content and 6 wt% fossil content. x=mol% of GalX salt. ....                                                                                                                                                                      | 3  |
| <b>Figure S2</b> A scheme representing the internally induced hydrolysis of GalX molecules a. the formation of water during salt polymerization b. generation of protons and c. the formation of a stable carbocation from GalXMe. ....                                                                                                                                                                   | 3  |
| <b>Figure S3</b> <sup>1</sup> H NMR of (a) PA(12,GalXH) <sub>x</sub> -co-PA(12,10) <sub>100-x</sub> , (b) PA(6,GalXH) <sub>x</sub> -co-PA(6,10) <sub>100-x</sub> and (c) PA(MXD,GalXH) <sub>x</sub> -co-PA(MXD,12) <sub>100-x</sub> series of polyamides recorded in a mixture of pentafluorophenol-d <sub>1</sub> (PFP)/chloroform-d <sub>1</sub> 1/4 v/v. subscripts=mol% of each salt in the feed..... | 4  |
| <b>Figure S4</b> <sup>1</sup> H NMR of (a) PA(12,GalXMe) <sub>x</sub> -co-PA(12,10) <sub>100-x</sub> and (b) PA(6,GalXMe) <sub>x</sub> -co-PA(6,10) <sub>100-x</sub> series of polyamides recorded in a mixture of pentafluorophenol-d <sub>1</sub> (PFP)/chloroform-d <sub>1</sub> 1/4 v/v. subscripts=mol% of each salt in the feed.....                                                                | 5  |
| <b>Figure S5</b> Typical DSC plots obtained for a. PA(12,GalXH) <sub>x</sub> -co-PA(12,10) <sub>100-x</sub> and b. PA(12,GalXMe) <sub>x</sub> -co-PA(12,10) <sub>100-x</sub> , representing the influence of the GalX content (indicated as % in the figure above) on the melting point and crystallinity of copolymers.....                                                                              | 6  |
| <b>Figure S6</b> MALDI-TOF spectrum of PA(12,GalXH) <sub>30</sub> -co-PA(12,10) <sub>70</sub> ( $M_{n,GPC}$ =8.1 kg/mol, $D$ =2.6). ....                                                                                                                                                                                                                                                                  | 7  |
| <b>Figure S7</b> MALDI-TOF spectrum of PA(12,GalXH) <sub>50</sub> -co-PA(12,10) <sub>50</sub> ( $M_{n,GPC}$ =7.4 kg/mol, $D$ =2.7). ....                                                                                                                                                                                                                                                                  | 8  |
| <b>Figure S8</b> MALDI-TOF spectrum of PA(12,GalXMe) <sub>30</sub> -co-PA(12,10) <sub>70</sub> ( $M_{n,GPC}$ =11.6 kg/mol, $D$ =8.7). ....                                                                                                                                                                                                                                                                | 9  |
| <b>Figure S9</b> MALDI-TOF spectrum of low molecular weight PA(6,GalXMe) <sub>30</sub> -co-PA(6,12) <sub>70</sub> ( $M_{n,GPC}$ =5.5 kg/mol, $D$ =5.3). ....                                                                                                                                                                                                                                              | 10 |

|                                                                                                                                                                                                                                                                                                                                          |    |
|------------------------------------------------------------------------------------------------------------------------------------------------------------------------------------------------------------------------------------------------------------------------------------------------------------------------------------------|----|
| <b>Figure S10</b> Time depended FT-IR spectrum recorded for reaction of (a) C12,C10 salt, (b) C6,C12 salt and (c) MXD,C12 salt. $\delta$ – bending (scissoring), $\nu$ – stretching vibration. Red arrows indicate the development of the signal along the reaction coordinates.....                                                     | 11 |
| <b>Figure S11</b> Time depended FT-IR spectrum recorded for reaction of (a) C6,C12 salt with C6,GalXH salt (ratio 50:50) and (b) C6,C12 salt with C6,GalXMe salt (ratio 50:50). $\delta$ – bending (scissoring), $\nu$ – stretching vibration. Red arrows indicate the development of the signal along the reaction coordinates.....     | 12 |
| <b>Figure S12</b> Time depended FT-IR spectrum recorded for reaction of (a) MXD,C12 salt with MXD,GalXH salt (ratio 50:50) and (b) MXD,C12 salt with MXD,GalXMe salt (ratio 50:50). $\delta$ – bending (scissoring), $\nu$ – stretching vibration. Red arrows indicate the development of the signal along the reaction coordinates..... | 13 |
| <b>Table S1</b> Melting temperatures (melting point measurement) of the prepared salts.....                                                                                                                                                                                                                                              | 5  |
| <b>Table S2</b> Low molecular weight GalX polyamides for Maldi- <i>ToF</i> analysis.....                                                                                                                                                                                                                                                 | 6  |

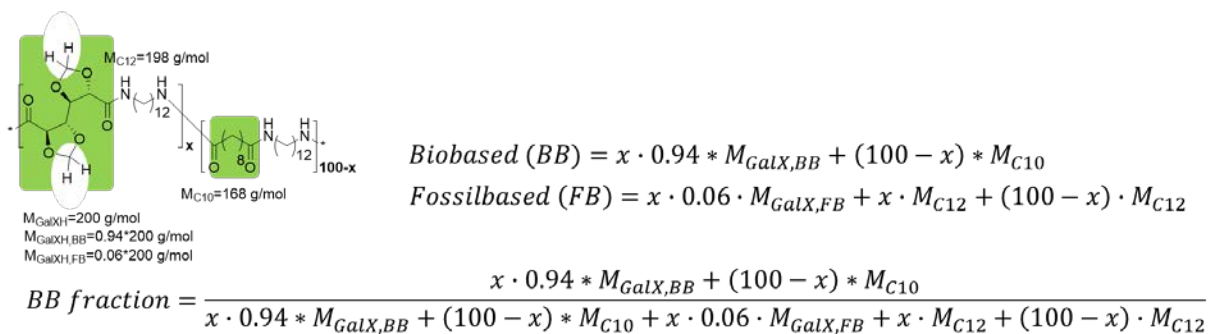

**Figure S1** Calculation of the biobased content on an example of PA(12, GalXH)<sub>x</sub>-co-PA(12, 10)<sub>100-x</sub>, with GalXH composed of 94 wt% bio-based content and 6 wt% fossil content. x=mol% of GalX salt.

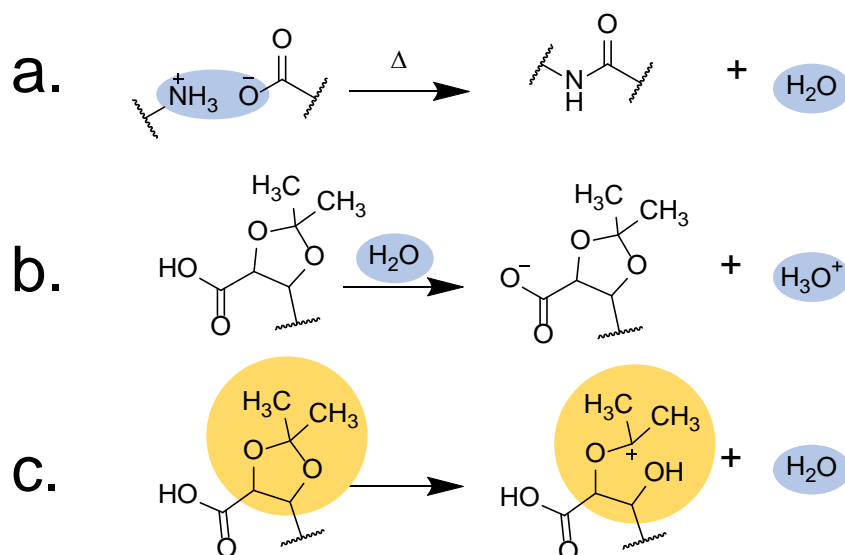

**Figure S2** A scheme representing the internally induced hydrolysis of GalX molecules a. the formation of water during salt polymerization b. generation of protons and c. the formation of a stable carbocation from GalXMe.

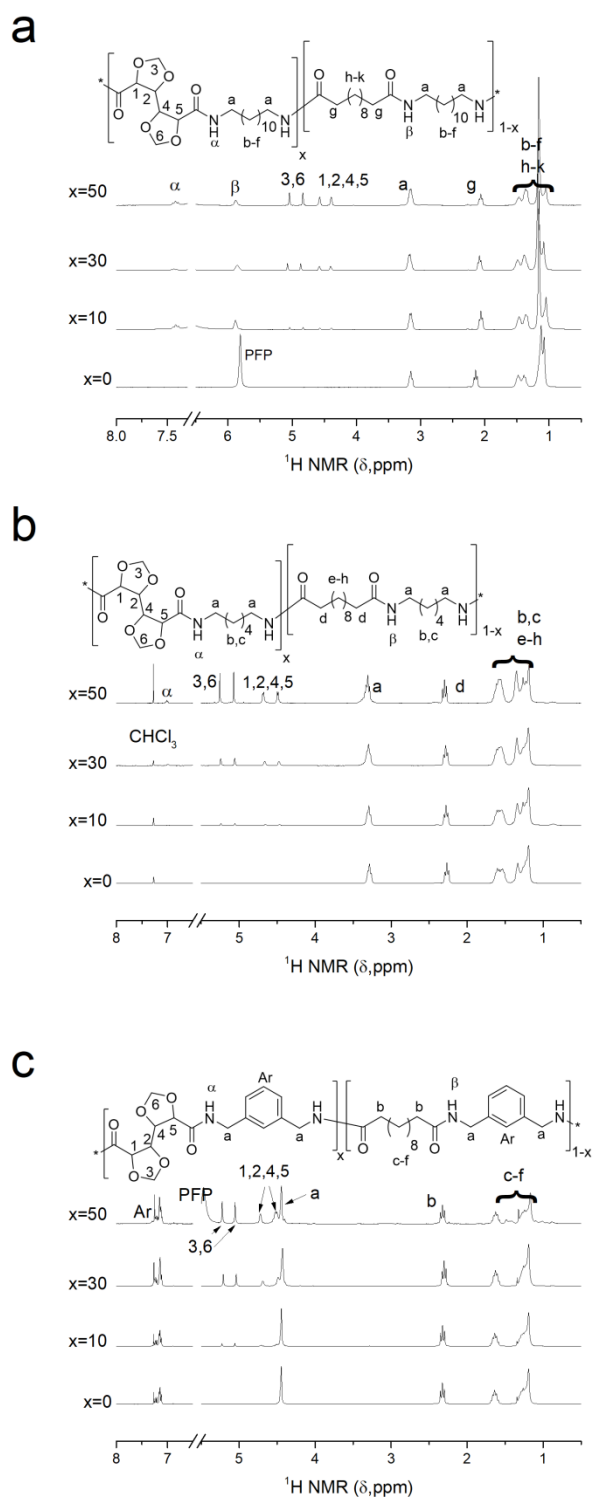

**Figure S3**  $^1\text{H}$  NMR of (a)  $\text{PA}(12,\text{GalXH})_x\text{-co-PA}(12,10)_{100-x}$ , (b)  $\text{PA}(6,\text{GalXH})_x\text{-co-PA}(6,10)_{100-x}$  and (c)  $\text{PA}(\text{MXD},\text{GalXH})_x\text{-co-PA}(\text{MXD},12)_{100-x}$  series of polyamides recorded in a mixture of pentafluorophenol- $d_1$  (PFP)/chloroform- $d_1$  1/4 v/v. subscripts=mol% of each salt in the feed.

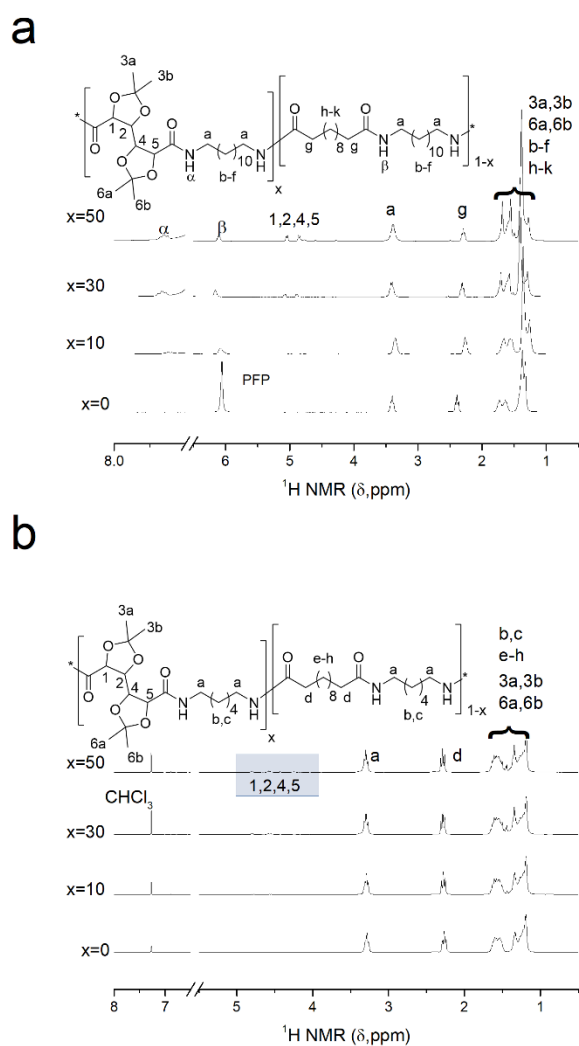

**Figure S4**  $^1\text{H}$  NMR of (a)  $\text{PA}(12, \text{GalXMe})_x\text{-co-PA}(12, 10)_{100-x}$  and (b)  $\text{PA}(6, \text{GalXMe})_x\text{-co-PA}(6, 10)_{100-x}$  series of polyamides recorded in a mixture of pentafluorophenol- $d_1$ (PFP)/chloroform- $d_1$  1/4 v/v. subscripts=mol% of each salt in the feed.

**Table S1** Melting temperatures (melting point measurement) of the prepared salts.

| Salt composition | $T_m$ [°C] | Salt composition | $T_m$ [°C] | Salt composition | $T_m$ [°C] |
|------------------|------------|------------------|------------|------------------|------------|
| C12,C10          | 160        | C12, GalXH       | 247        | C12, GalXMe      | 221        |
| C6,C12           | 191        | C6, GalXH        | 272        | C6, GalXMe       | 261        |
| MXD,C12          | 131        | MXD, GalXH       | 242        | MXD, GalXMe      | 255        |

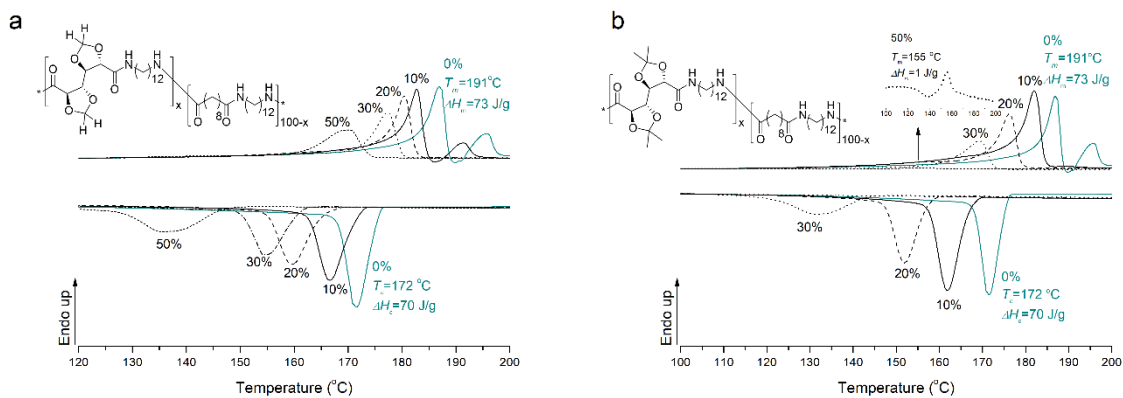

**Figure S5** Typical DSC plots obtained for a. PA(12, GalXH)<sub>x</sub>-co-PA(12, 10)<sub>100-x</sub> and b. PA(12, GalXMe)<sub>x</sub>-co-PA(12, 10)<sub>100-x</sub>, representing the influence of the GalX content (indicated as % in the figure above) on the melting point and crystallinity of copolymers.

**Table S2** Low molecular weight GalX polyamides for MALDI-TOF analysis

| Copolymer                                                 | $M_n^{(a)}$<br>[kg·mol <sup>-1</sup> ] | $\bar{D}^{(a)}$ |
|-----------------------------------------------------------|----------------------------------------|-----------------|
| PA(12, GalXH) <sub>30</sub> -co-PA(12, 10) <sub>70</sub>  | 8.1                                    | 2.6             |
| PA(12, GalXH) <sub>50</sub> -co-PA(12, 10) <sub>50</sub>  | 7.4                                    | 2.7             |
| PA(12, GalXMe) <sub>30</sub> -co-PA(12, 10) <sub>70</sub> | 11.6                                   | 8.7             |
| PA(6, GalXMe) <sub>30</sub> -co-PA(6, 12) <sub>70</sub>   | 5.5                                    | 5.3             |

(a) Molecular weight of the polyamides determined by GPC,  $\bar{D}$  – dispersity

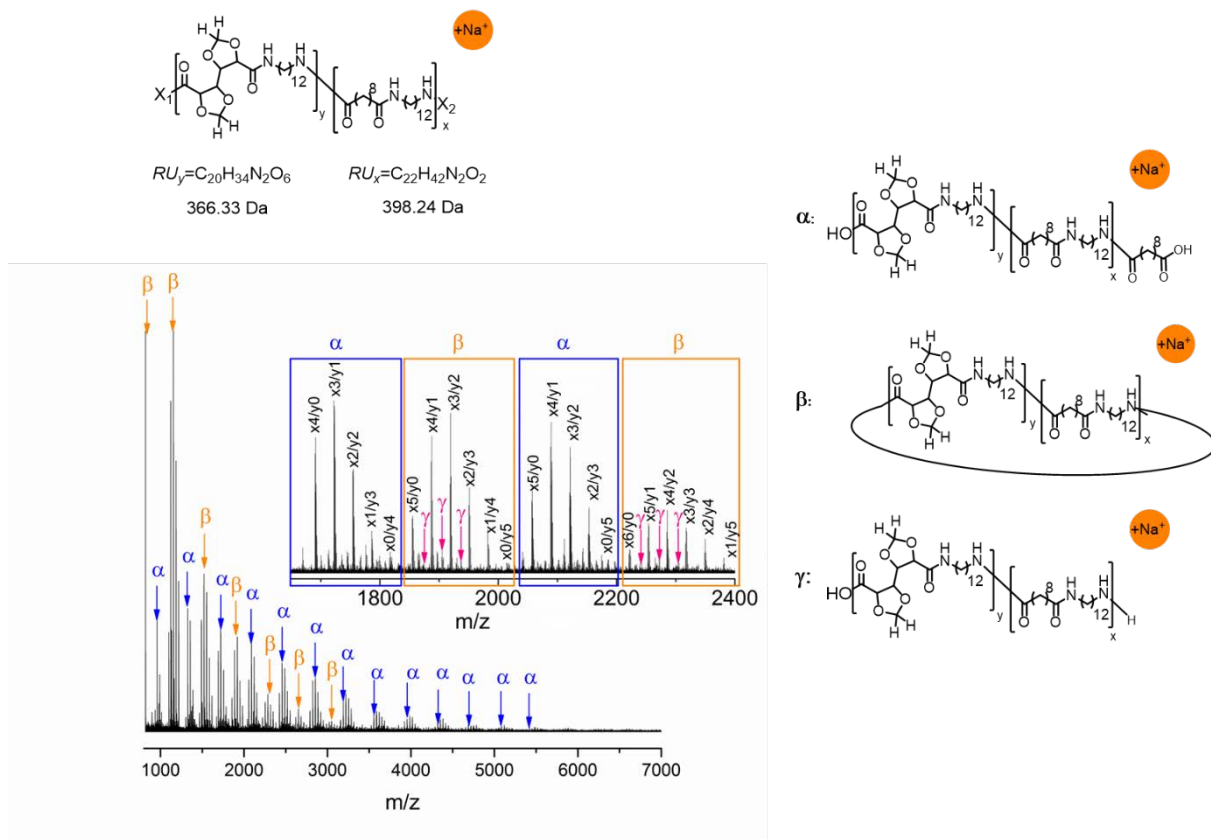

**Figure S6** MALDI-TOF spectrum of PA(12,GalXH)<sub>30</sub>-CO-PA(12,10)<sub>70</sub> ( $M_{n,GPC}=8.1$  kg/mol,  $D=2.6$ ).

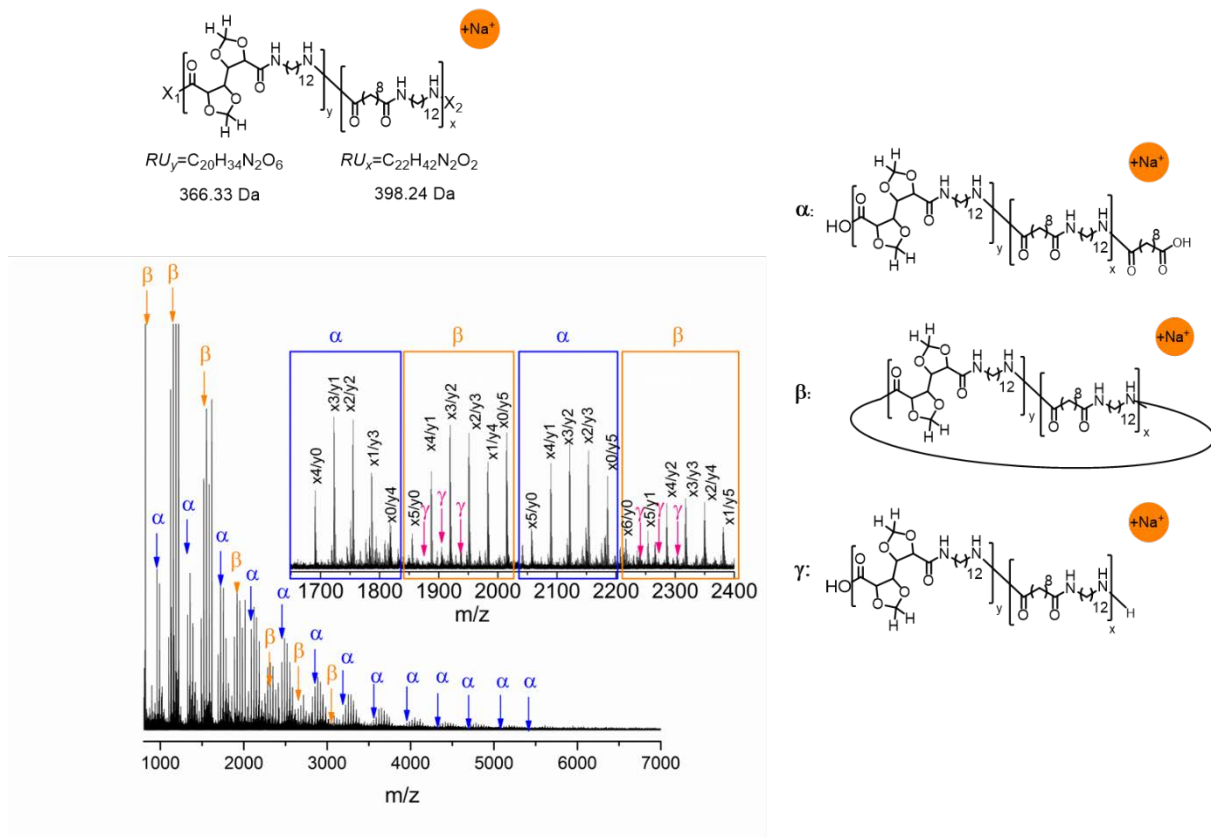

**Figure S7** MALDI-TOF spectrum of PA(12, GalXH)<sub>50</sub>-co-PA(12, 10)<sub>50</sub> ( $M_{n, GPC}$ =7.4 kg/mol,  $D$ =2.7).







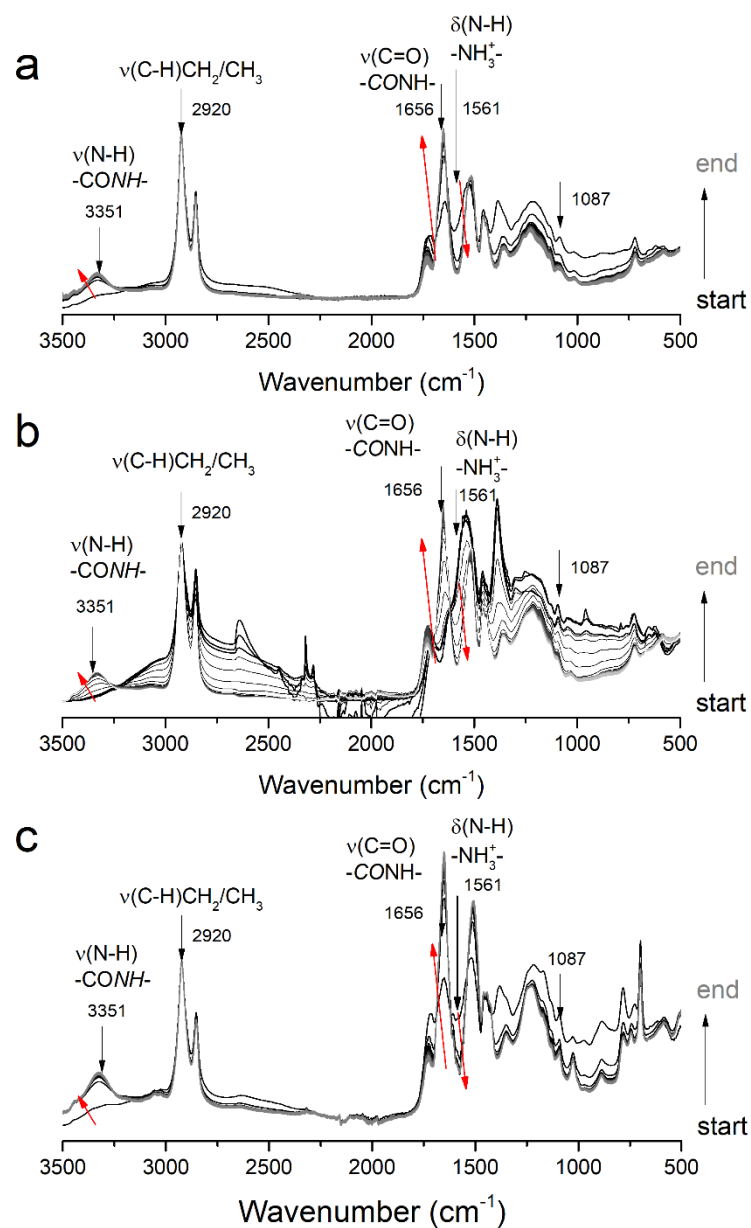

**Figure S10** Time depended FT-IR spectrum recorded for reaction of (a) C12,C10 salt, (b) C6,C12 salt and (c) MXD,C12 salt.  $\delta$  – bending (scissoring),  $\nu$  – stretching vibration. Red arrows indicate the development of the signal along the reaction coordinates.

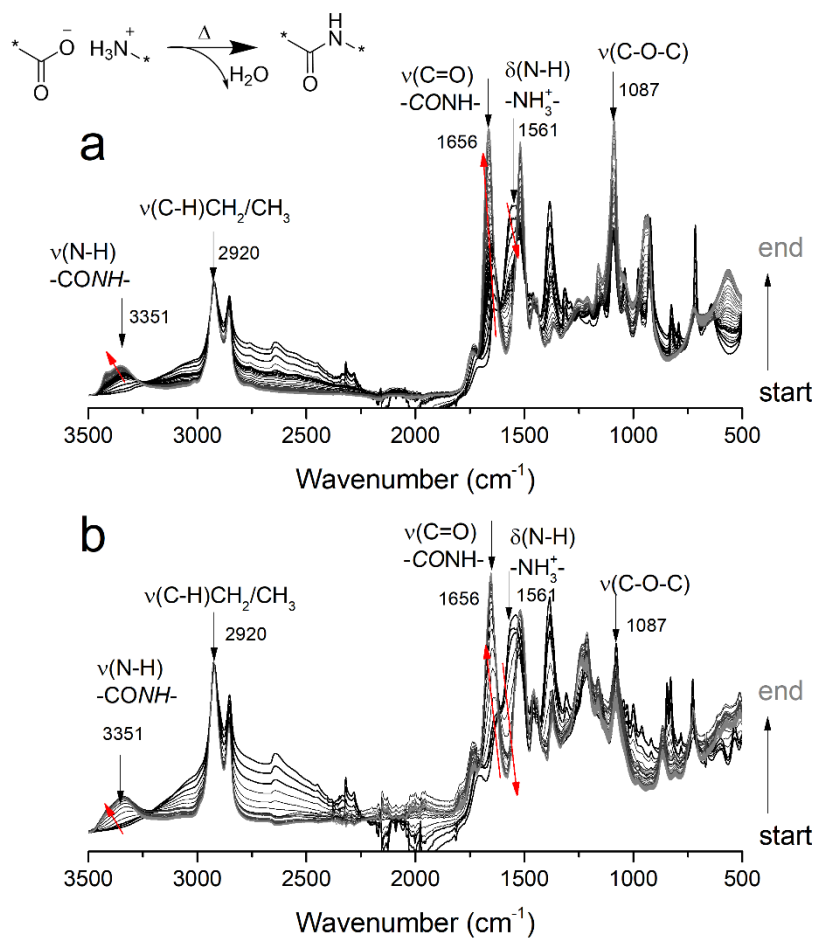

**Figure S11** Time depended FT-IR spectrum recorded for reaction of (a) C6,C12 salt with C6,GalXH salt (ratio 50:50) and (b) C6,C12 salt with C6,GalXMe salt (ratio 50:50).  $\delta$  – bending (scissoring),  $\nu$  – stretching vibration. Red arrows indicate the development of the signal along the reaction coordinates.

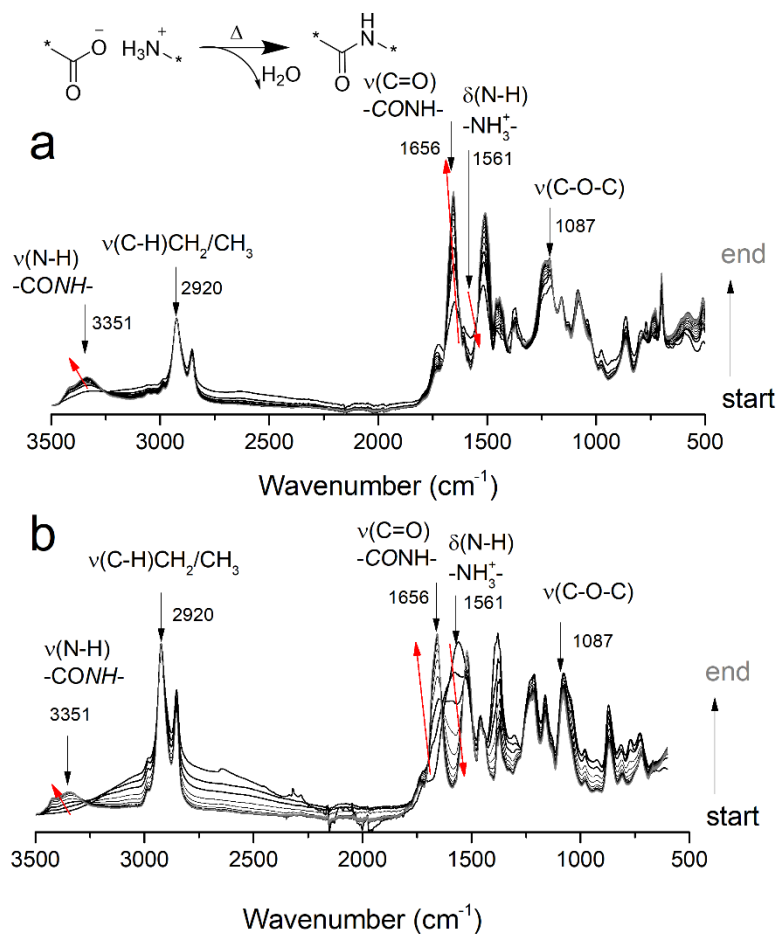

**Figure S12** Time depended FT-IR spectrum recorded for reaction of (a) MXD,C12 salt with MXD,GalXH salt (ratio 50:50) and (b) MXD,C12 salt with MXD,GalXMe salt (ratio 50:50).  $\delta$  – bending (scissoring),  $\nu$  – stretching vibration. Red arrows indicate the development of the signal along the reaction coordinates.
